# Supplementary material for: Effectiveness of a Group-Based Rehabilitation Program Combining Education with Multimodal Exercises in the Treatment of Patients with Nonspecific Chronic Low Back Pain: A Retrospective Uncontrolled Study
Source: Biology (Basel). 2022 Oct 14;11(10):1508. doi: 10.3390/biology11101508 (PMC9598691; doi:10.3390/biology11101508)
Supplement: Supplementary file 1 [file biology-11-01508-s001.zip › biology-1958225-supplementary.pdf]

**Table S1: Description of the 8-week intervention program**

|                                                      |                                                                                                                                                                                                                                                                                                                                                |                                                                                                                                                                                                                                 |                                                                                                                                                                                                                                                                                                                                      |                                                                                                                                                                                                                                           |                                                                                                                                                                                                                                             |
|------------------------------------------------------|------------------------------------------------------------------------------------------------------------------------------------------------------------------------------------------------------------------------------------------------------------------------------------------------------------------------------------------------|---------------------------------------------------------------------------------------------------------------------------------------------------------------------------------------------------------------------------------|--------------------------------------------------------------------------------------------------------------------------------------------------------------------------------------------------------------------------------------------------------------------------------------------------------------------------------------|-------------------------------------------------------------------------------------------------------------------------------------------------------------------------------------------------------------------------------------------|---------------------------------------------------------------------------------------------------------------------------------------------------------------------------------------------------------------------------------------------|
| Education<br>(5 sessions)                            | Individual session (30min) - Individual initial assessment                                                                                                                                                                                                                                                                                     | Group session 1 (90min) - Meeting the group                                                                                                                                                                                     | Group session 2 (90min) - Understanding Pain Neurophysiology                                                                                                                                                                                                                                                                         | Group session 3 (90min) - Posture, ergonomics and loads                                                                                                                                                                                   | Group session 4 (90min) - Final assessment                                                                                                                                                                                                  |
|                                                      | <b>Topic 1:</b> introducing the program to the patient.<br><b>Topic 2:</b> understanding the participants' cognitions, beliefs and attitudes towards pain and the behaviours adopted in their daily life activities.<br><b>Topic 3:</b> establishing SMART goals for the program.                                                              | <b>Topic 1:</b> listening each patient's LBP history and promoting dialogue between the group.<br><b>Topic 2:</b> providing general information about myths and facts in LBP while challenging the patient's beliefs about LBP. | <b>Topic 1:</b> increasing the knowledge regarding pain: from acute to chronic MSK pain.<br><b>Topic 2:</b> understanding the role of the brain, as well as the psychosocial and behavioral factors on the maintenance of chronic pain.<br><b>Topic 3:</b> managing pain flare-ups with graded physical activity to reduce symptoms. | <b>Topic 1:</b> challenging the behaviours about pain, posture and carrying objects.<br><b>Topic 2:</b> practical simulation: posture and load management<br><b>Topic 3:</b> self-management exercises during prolonged sitting position. | <b>Topic 1:</b> reviewing the principal information about LBP and chronic MSK pain.<br><b>Topic 2:</b> assessing each participant goals and general participation in the program.                                                           |
| Pilates based-mat exercises<br>(6 sessions of 60min) | Basic                                                                                                                                                                                                                                                                                                                                          |                                                                                                                                                                                                                                 | Intermediate                                                                                                                                                                                                                                                                                                                         | Advanced                                                                                                                                                                                                                                  |                                                                                                                                                                                                                                             |
|                                                      | Spine exercises: bridge; rolling back down/up (knees flexed and rolling forward); hamstring stretch; swan front; tower (V position with elastic forward and upward); mermaid (both hands on swissball).                                                                                                                                        |                                                                                                                                                                                                                                 | Bridge variant (swissbal); rolling back down/up (knees extended and rolling forward); hamstring stretch (crossed legs); swan (taking off the arms); long spine (V position with elastic forward and upward); mermaid (one hands on swissball).                                                                                       | Single-leg bridge; rolling up (rolling back and forward); hamstring stretch (swiss ball); swan (taking off arms and legs); jackknife; side arm sit variant.                                                                               |                                                                                                                                                                                                                                             |
|                                                      | Lower Limb Exercises footwork double legato (four supports rising one leg); side kicks up and down; side kicks inner-thigh lifts; fire hydrant; horse.                                                                                                                                                                                         |                                                                                                                                                                                                                                 | Footwork double legato (four supports with mild elastic band); side kicks up and down (mild weight); side kicks inner-thigh lifts (mild weight); fire hydrant (mild elastic); horse (mild elastic).                                                                                                                                  | Footwork double legato (four supports with heavy elastic band); side kicks up and down (heavy weight); side kicks inner-thigh lifts (heavy weight); fire hydrant (heavy elastic); horse (heavy elastic).                                  |                                                                                                                                                                                                                                             |
|                                                      | Upper Limb Exercises: arms biceps (with elastic); arms pull up and down; arms triceps (mild elastic).                                                                                                                                                                                                                                          |                                                                                                                                                                                                                                 | Arms biceps (flexed legs with elastic); arms pulling (mild elastic); arms triceps (mild elastic without feet support).                                                                                                                                                                                                               | Arms biceps (standing with elastic); arms pulling variant (heavy elastic); arms triceps (heavy elastic without feet support).                                                                                                             |                                                                                                                                                                                                                                             |
|                                                      | Abdominal Exercises: teaser; the hundred (pumpings arms and stretching legs); prone bridge with knees and feet supported.                                                                                                                                                                                                                      |                                                                                                                                                                                                                                 | The hundred variant (with feet on the air); the hundred (raising the swissball); prone bridge with knees supported.                                                                                                                                                                                                                  | Exercise with swissball; the hundred variant (side); prone bridge.                                                                                                                                                                        |                                                                                                                                                                                                                                             |
| Resistance training<br>(6 sessions of 60min)         | Warm-up (10min): Cardiovascular exercise (treadmill, elliptical, bike or row), low to moderate intensity.                                                                                                                                                                                                                                      |                                                                                                                                                                                                                                 |                                                                                                                                                                                                                                                                                                                                      |                                                                                                                                                                                                                                           |                                                                                                                                                                                                                                             |
|                                                      | Stage 1: 2 sessions (OMNI: 4)<br>Isolated movements and isometric control, with controlled respiration in weight bearing with neutral lordosis.<br>11 exercises circuit, 20 reps/No rest between exercises, 1-2 sets<br>Exercises: specific isometric co-contraction of tranversus abdominus.                                                  |                                                                                                                                                                                                                                 | Stage 2: 2 sessions (OMNI: 6-7)<br>Isometric and analytic control: 9 exercises circuit, 15 reps/set, 30sec active rest, 2-3 sets.<br>Exercises: abdominal crunch, back extension, side plank, elbow bridge, squat, lunges, seat pull and row.                                                                                        |                                                                                                                                                                                                                                           | Stage 3: 2 sessions (OMNI: 8-9)<br>Isometric, analytic and integrated chain control<br>11 exercises, 12 reps/set, 30 sec active rest, 3 sets.<br>Exercises: Single leg Deadlift. Anterior Reach. Lunges. Stand row. Pull squat. Stand push. |
|                                                      | Cool-down (10min): General stretching exercises for the major muscle groups, holding 10-30 sec.                                                                                                                                                                                                                                                |                                                                                                                                                                                                                                 |                                                                                                                                                                                                                                                                                                                                      |                                                                                                                                                                                                                                           |                                                                                                                                                                                                                                             |
|                                                      |                                                                                                                                                                                                                                                                                                                                                |                                                                                                                                                                                                                                 |                                                                                                                                                                                                                                                                                                                                      |                                                                                                                                                                                                                                           |                                                                                                                                                                                                                                             |
| Aquatic exercise<br>(8 sessions of 60min)            | Warm-up (10min): 1- General mobility exercise, increasing range of motion; 2- Static walk.                                                                                                                                                                                                                                                     |                                                                                                                                                                                                                                 |                                                                                                                                                                                                                                                                                                                                      |                                                                                                                                                                                                                                           |                                                                                                                                                                                                                                             |
|                                                      | Main exercises (30min): 1 - Walter walking / jogging (forward and backward); 2 - forward and side lungdes; 3 - Supine postion with hip and knee bent; 4- Supine position+cycling; 5- Shoulder transvers (abduction, adduction, flexion and extension); 6 - Upper body mobilisation (with kickboard); 7 - Wall push-up; 8 - Deep water cycling. |                                                                                                                                                                                                                                 |                                                                                                                                                                                                                                                                                                                                      |                                                                                                                                                                                                                                           |                                                                                                                                                                                                                                             |
|                                                      | Cool-down (10min): 1 - General stretching of the major muscle groupns, holding 10-20 sec; 2 - Deep breathing technique and relaxation; 3 - Sel-care free water-activity.                                                                                                                                                                       |                                                                                                                                                                                                                                 |                                                                                                                                                                                                                                                                                                                                      |                                                                                                                                                                                                                                           |                                                                                                                                                                                                                                             |
